# Supplementary material
Source: publisher figshare collection journal article supplement (https://aacr.figshare.com/articles/dataset/_/23814318)
Supplement: Supplementary file 1 [file 41783175]

## PDX C1138 G13D

**A**

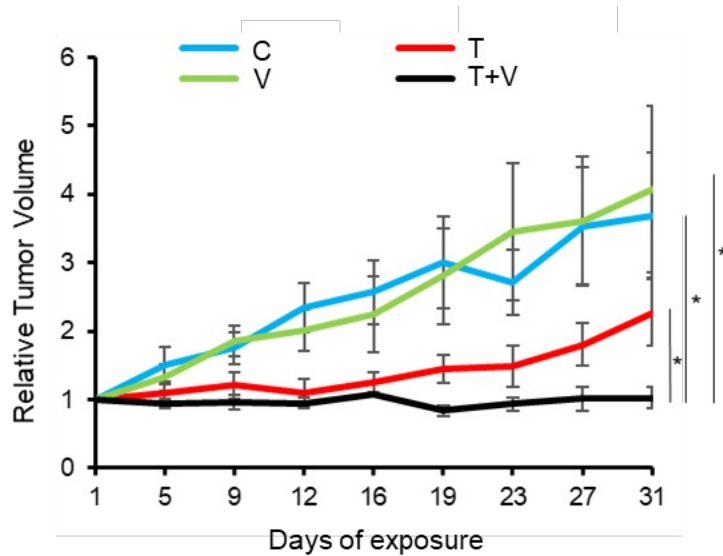

**B**

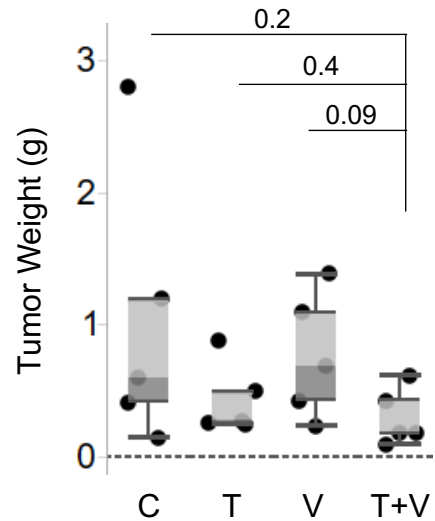

### **Supplementary Figure 3: Combination of trametinib and vincristine inhibits tumor growth and reduces tumor weight in PDX C1138.**

Another set of PDX C1138 were grown subcutaneously in nude mice, which were treated with vehicle (C), trametinib (T), vincristine (V), or a combination (T+V). Tumor volumes were measured at the indicated days (tumors implanted on day 0). **(A)** Relative tumor growth curves. Day 1 indicates start of treatment. Data are presented as mean  $\pm$  SEM, 5 mice per group.  $*P < 0.05$  compared to control and the single agents, Student *t*-test. **(B)** Graph of the weights of harvested tumors. Each dot represents a single tumor. *P* values represent T+V vs. all other treatments;  $P < 0.05$  was considered significant.
